# Supplementary material for: Computational design of efficient near-infrared TADF emitters with hot-exciton characteristics
Source: Royal Society of Chemistry journal article supplement (doi:10.1039/d3nj01955a), 2023-01-01
Supplement: d3nj01955a1.pdf [file d3nj01955a1.pdf]

Supplementary information

## Computational Design of Efficient Near-Infrared TADF Emitters with Hot-exciton Characteristics

Jesni M Jacob<sup>a</sup>, Pralok K. Samanta<sup>b</sup> and Mahesh Kumar Ravva<sup>a\*</sup>

<sup>a</sup>*Department of Chemistry, SRM University-AP, Amaravati, India 522240*

<sup>b</sup>*Department of Chemistry, School of Science, GITAM University, Hyderabad, India 502329*

*\*corresponding author: [mahesh.r@srmap.edu.in](mailto:mahesh.r@srmap.edu.in)*

### Table of contents

|                  |                                                                                                                                                                                               |
|------------------|-----------------------------------------------------------------------------------------------------------------------------------------------------------------------------------------------|
| <b>Table S1</b>  | Calculated dihedral angles between donor and AZ units, HOMO and LUMO energies as obtained from M06-2X/6-31G** level of theory in the gas phase.                                               |
| <b>Figure S1</b> | Structure of CAT-1.                                                                                                                                                                           |
| <b>Figure S2</b> | HOMO-LUMO wavefunctions for the newly designed molecules using M06-2X/6-31G** level of theory.                                                                                                |
| <b>Table S2</b>  | Calculated five lowest singlets, and five lowest triplets state energies as obtained from M06-2X/6-31G** level of theory in the gas phase. All values are in eV.                              |
| <b>Figure S3</b> | Representation of calculated $\Delta r$ indices for the molecules under study.                                                                                                                |
| <b>Figure S4</b> | Spatial distribution of the hole and electron wavefunctions corresponds to the singlet ( $S_6$ - $S_{10}$ ) and triplet ( $T_6$ - $T_{10}$ ) excited states of the three potential molecules. |
| <b>Table S3</b>  | Calculated $\Delta r$ indices of the newly designed molecules for the $S_n$ and $T_m$ states in Å units.                                                                                      |
| <b>Table S4</b>  | Charge transfer ratio among fragments of potential hot-exciton NIR-TADF emitters.                                                                                                             |
| <b>Figure S5</b> | Optimized geometries of NZ and AZ based newly designed molecules (D1NZPZH, D1NZFPZH, D1NZCNPZH, D1AZPZH, D1AZFPZH, and D1AZCNPZH) as determined at the M06-2X/6-31G** level of theory.        |

|                  |                                                                                                                                                                                                                  |
|------------------|------------------------------------------------------------------------------------------------------------------------------------------------------------------------------------------------------------------|
| <b>Table S5</b>  | Calculated excited state energies, absorption wavelengths and HOMO and LUMO gap of some inspirational molecules towards D-A1-A2 type molecules as obtained from M06-2X/6-31G** level of theory in the gas phase. |
| <b>Figure S6</b> | Comparison of geometrical parameters, RMSD, $k_{nr}$ and $k_r$ of CAT-1 and D1AZ2BZH at M06-2X/6-31G** level of theory.                                                                                          |
| <b>Figure S7</b> | Comparison of new structures based on thiophene, tetrazine and nitrogen substituted D1AZ2BZH at M06-2X/6-31G** level of theory.                                                                                  |

**Table S1.** Calculated dihedral angles between donor and AZ units, HOMO and LUMO energies as obtained from M06-2X/6-31G\*\* level of theory in the gas phase.

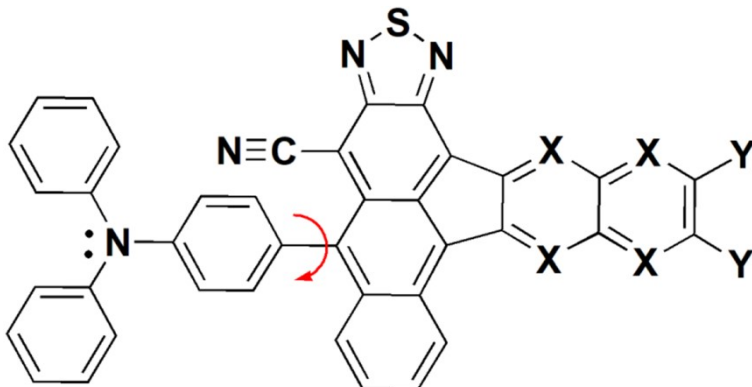

| Compounds  | Dihedral angle<br><i>D - AZ</i><br>(in °) | HOMO<br>(eV) | LUMO<br>(eV) | HOMO-LUMO<br>gap<br>(eV) |
|------------|-------------------------------------------|--------------|--------------|--------------------------|
| D1AZ2BZH   | 85.81                                     | -6.09        | -2.95        | -3.14                    |
| D1AZ2BZF   | 85.05                                     | -6.15        | -3.07        | -3.08                    |
| D1AZ2BZCN  | 83.36                                     | -6.32        | -3.42        | -2.90                    |
| D1AZ2PZH   | 84.18                                     | -6.25        | -3.28        | -2.97                    |
| D1AZ2PZF   | 82.22                                     | -6.32        | -3.41        | -2.91                    |
| D1AZ2PZCN  | 78.33                                     | -6.48        | -3.73        | -2.75                    |
| D1AZBZPZH  | 85.50                                     | -6.15        | -3.09        | -3.06                    |
| D1AZBZPZF  | 84.56                                     | -6.22        | -3.22        | -3.00                    |
| D1AZBZPZCN | 82.61                                     | -6.37        | -3.54        | -2.83                    |
| D1AZPZBZH  | 84.80                                     | -6.18        | -3.12        | -3.06                    |
| D1AZPZBZHF | 83.70                                     | -6.24        | -3.24        | -3.00                    |
| D1AZPZBZCN | 80.94                                     | -6.41        | -3.59        | -2.82                    |

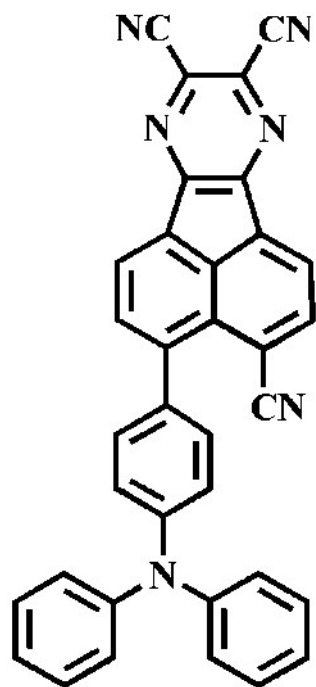

**Figure S1.** Structure of CAT-1.

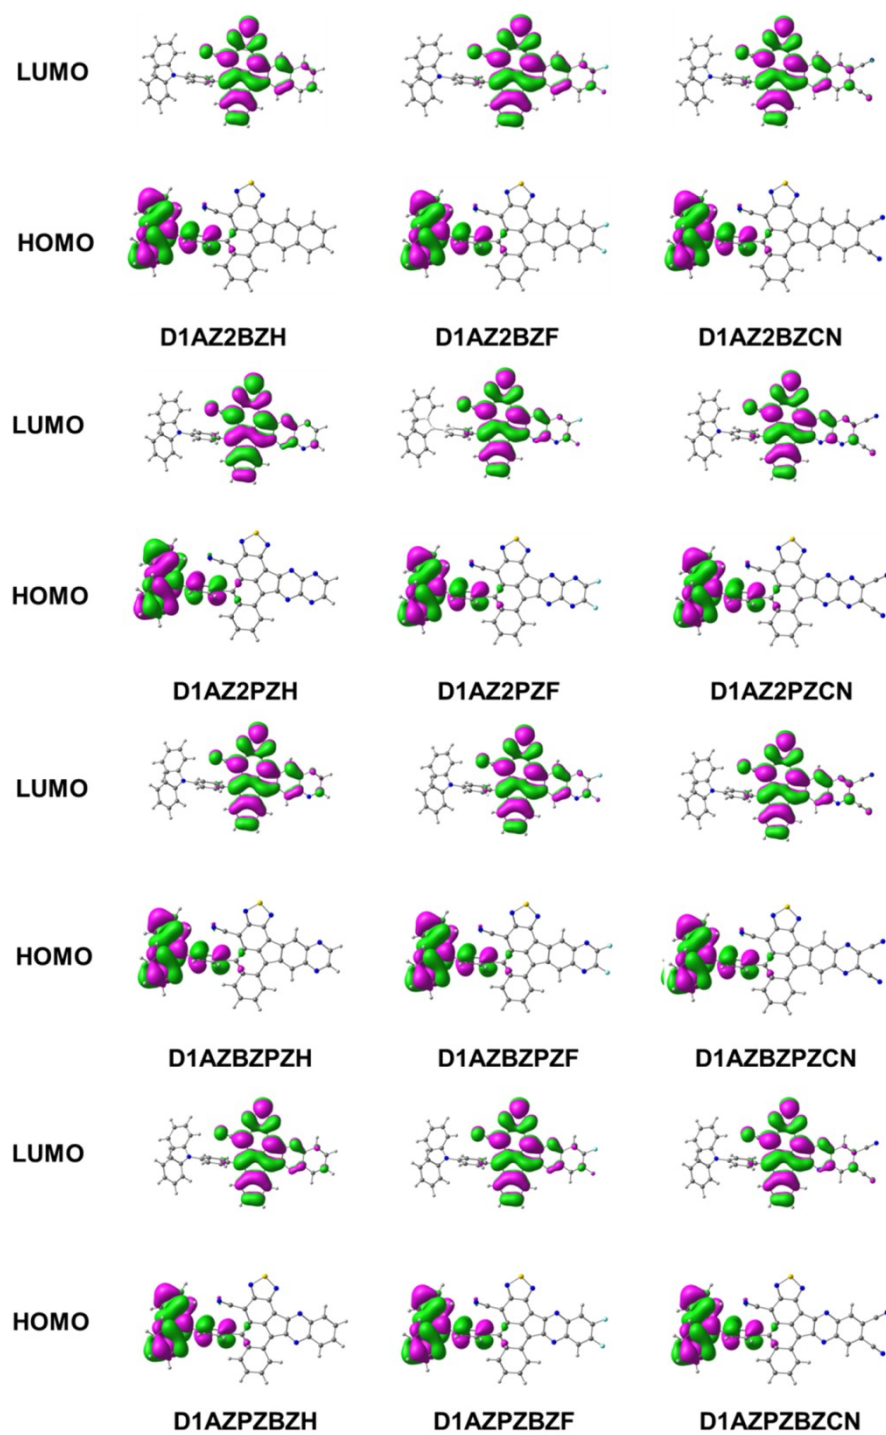

**Figure S2.** HOMO-LUMO wavefunctions for the newly designed molecules using M06-2X/6-31G\*\* level of theory.

**Table S2.** Calculated five lowest singlets, and five lowest triplets state energies as obtained from M06-2X/6-31G\*\* level of theory in the gas phase. All values are in eV.

|                   | <b>S<sub>1</sub></b> | <b>S<sub>2</sub></b> | <b>S<sub>3</sub></b> | <b>S<sub>4</sub></b> | <b>S<sub>5</sub></b> | <b>T<sub>1</sub></b> | <b>T<sub>2</sub></b> | <b>T<sub>3</sub></b> | <b>T<sub>4</sub></b> | <b>T<sub>5</sub></b> |
|-------------------|----------------------|----------------------|----------------------|----------------------|----------------------|----------------------|----------------------|----------------------|----------------------|----------------------|
| <b>D1AZ2BZH</b>   | 1.90                 | 2.03                 | 2.63                 | 3.30                 | 3.57                 | 0.63                 | 1.98                 | 2.03                 | 2.77                 | 2.83                 |
| <b>D1AZ2BZF</b>   | 1.91                 | 1.98                 | 2.62                 | 3.38                 | 3.56                 | 0.64                 | 1.95                 | 1.99                 | 2.76                 | 2.93                 |
| <b>D1AZ2BZCN</b>  | 1.77                 | 1.94                 | 2.77                 | 3.43                 | 3.49                 | 0.66                 | 1.77                 | 2.03                 | 2.72                 | 2.88                 |
| <b>D1AZ2PZH</b>   | 1.81                 | 2.02                 | 2.90                 | 3.00                 | 3.22                 | 0.74                 | 1.81                 | 2.08                 | 2.66                 | 2.70                 |
| <b>D1AZ2PZF</b>   | 1.74                 | 2.02                 | 2.82                 | 3.25                 | 3.34                 | 0.75                 | 1.74                 | 2.05                 | 2.64                 | 2.86                 |
| <b>D1AZ2PZCN</b>  | 1.58                 | 2.00                 | 2.72                 | 2.94                 | 3.01                 | 0.75                 | 1.58                 | 2.04                 | 2.59                 | 2.61                 |
| <b>D1AZBZPZH</b>  | 1.92                 | 1.97                 | 2.74                 | 3.50                 | 3.60                 | 0.66                 | 1.94                 | 2.02                 | 2.74                 | 3.00                 |
| <b>D1AZBZPZF</b>  | 1.86                 | 1.97                 | 2.69                 | 3.51                 | 3.60                 | 0.68                 | 1.86                 | 2.00                 | 2.72                 | 3.03                 |
| <b>D1AZBZPZCN</b> | 1.70                 | 1.95                 | 2.83                 | 3.03                 | 3.25                 | 0.68                 | 1.70                 | 2.03                 | 2.65                 | 2.71                 |
| <b>D1AZPZBZH</b>  | 1.90                 | 2.01                 | 2.78                 | 3.27                 | 3.44                 | 0.72                 | 1.91                 | 2.05                 | 2.70                 | 2.96                 |
| <b>D1AZPZBZF</b>  | 1.84                 | 2.01                 | 2.76                 | 3.38                 | 3.40                 | 0.73                 | 1.84                 | 2.04                 | 2.68                 | 2.92                 |
| <b>D1AZPZBZCN</b> | 1.66                 | 2.00                 | 2.91                 | 3.14                 | 3.32                 | 0.74                 | 1.66                 | 2.07                 | 2.65                 | 2.80                 |

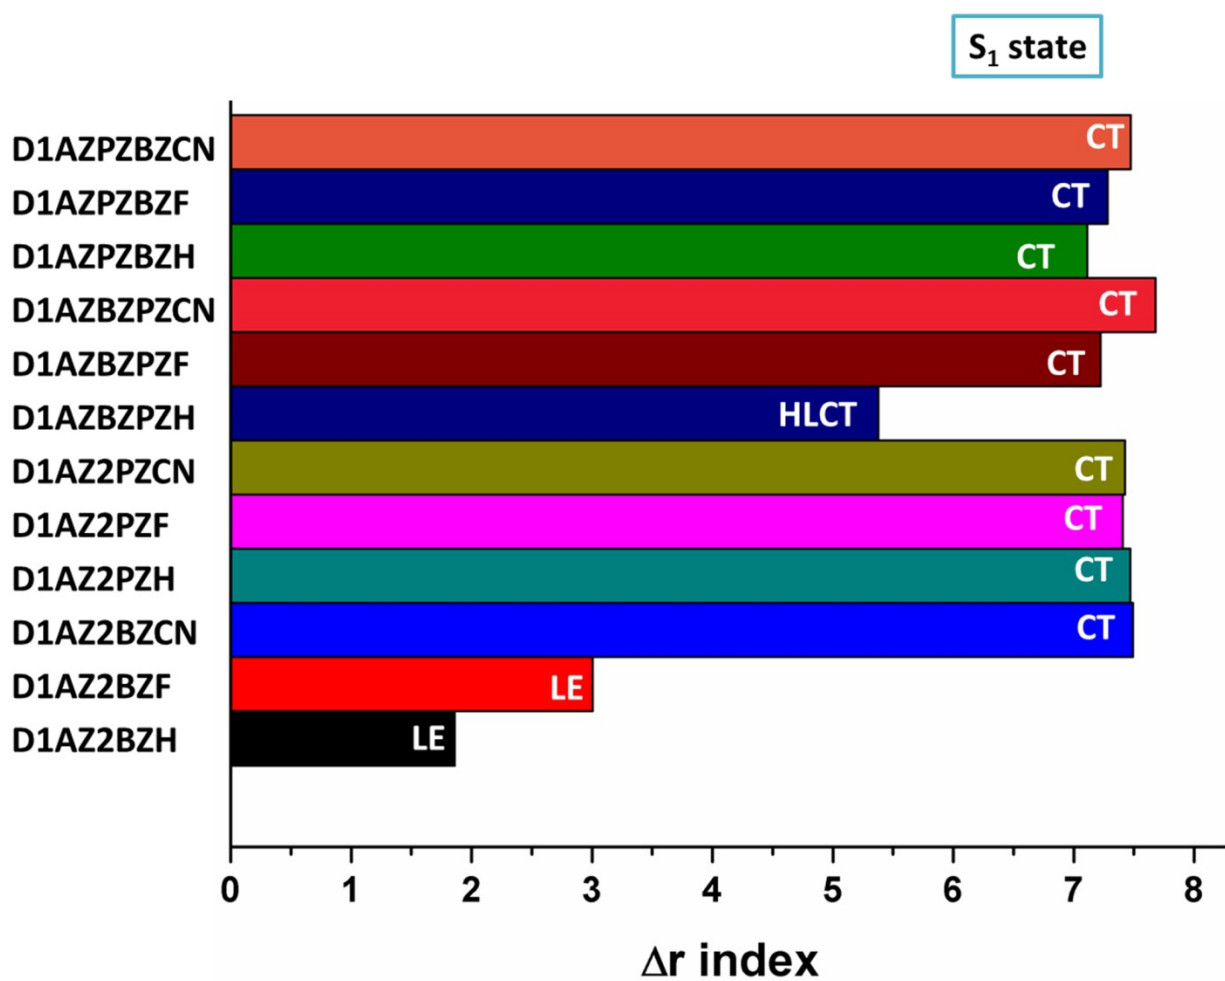

Figure S3. Representation of calculated  $\Delta r$  indices for the molecules under study.

D1AZ2BZH

ELECTRON

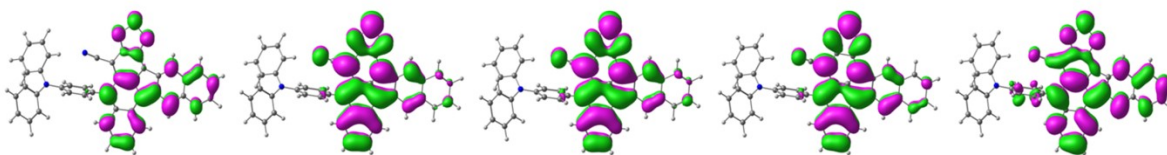

HLCT ↑  
22 %CT  
78 %LE

CT ↑

CT ↑

HLCT ↑  
10 %CT  
90 %LE

CT ↑

HOLE

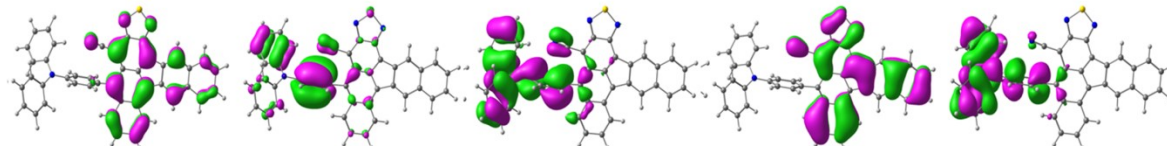

S<sub>6</sub>

S<sub>7</sub>

S<sub>8</sub>

S<sub>9</sub>

S<sub>10</sub>

ELECTRON

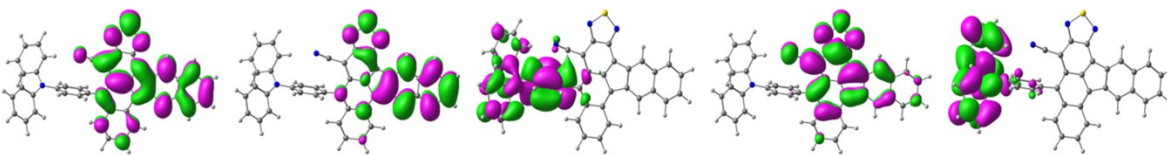

LE ↑

HLCT ↑  
7 %CT  
93 %LE

LE ↑

LE ↑

LE ↑

HOLE

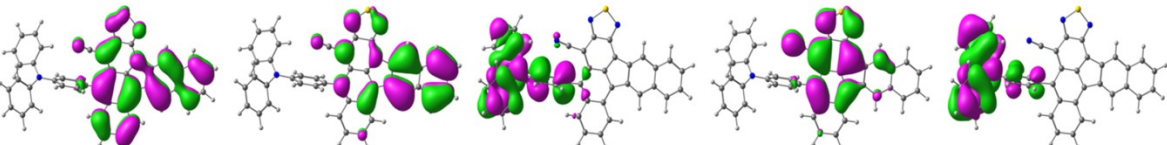

T<sub>6</sub>

T<sub>7</sub>

T<sub>8</sub>

T<sub>9</sub>

T<sub>10</sub>



D1AZ2BZF

ELECTRON

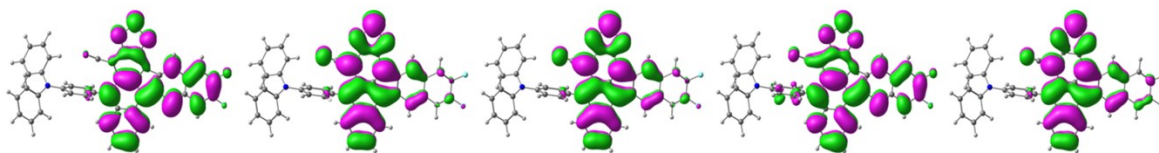

HLCT ↑ 33 %CT  
67 %LE

CT ↑

CT ↑

CT ↑

HLCT ↑ 17 %CT  
83 %LE

HOLE

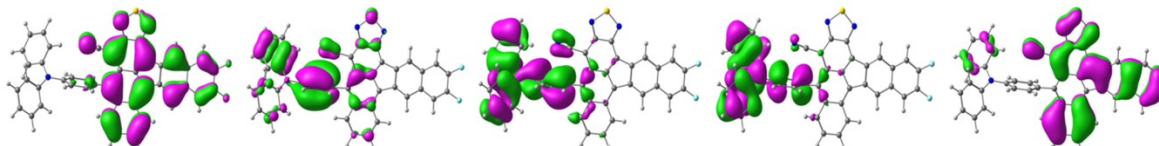

S<sub>6</sub>

S<sub>7</sub>

S<sub>8</sub>

S<sub>9</sub>

S<sub>10</sub>

ELECTRON

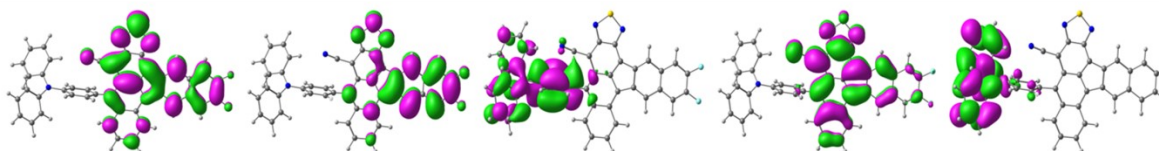

HLCT ↑ 11 %CT  
89 %LE

HLCT ↑ 8 %CT  
92 %LE

LE ↑

LE ↑

LE ↑

HOLE

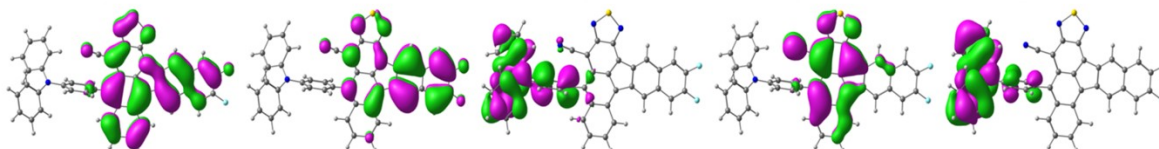

T<sub>6</sub>

T<sub>7</sub>

T<sub>8</sub>

T<sub>9</sub>

T<sub>10</sub>

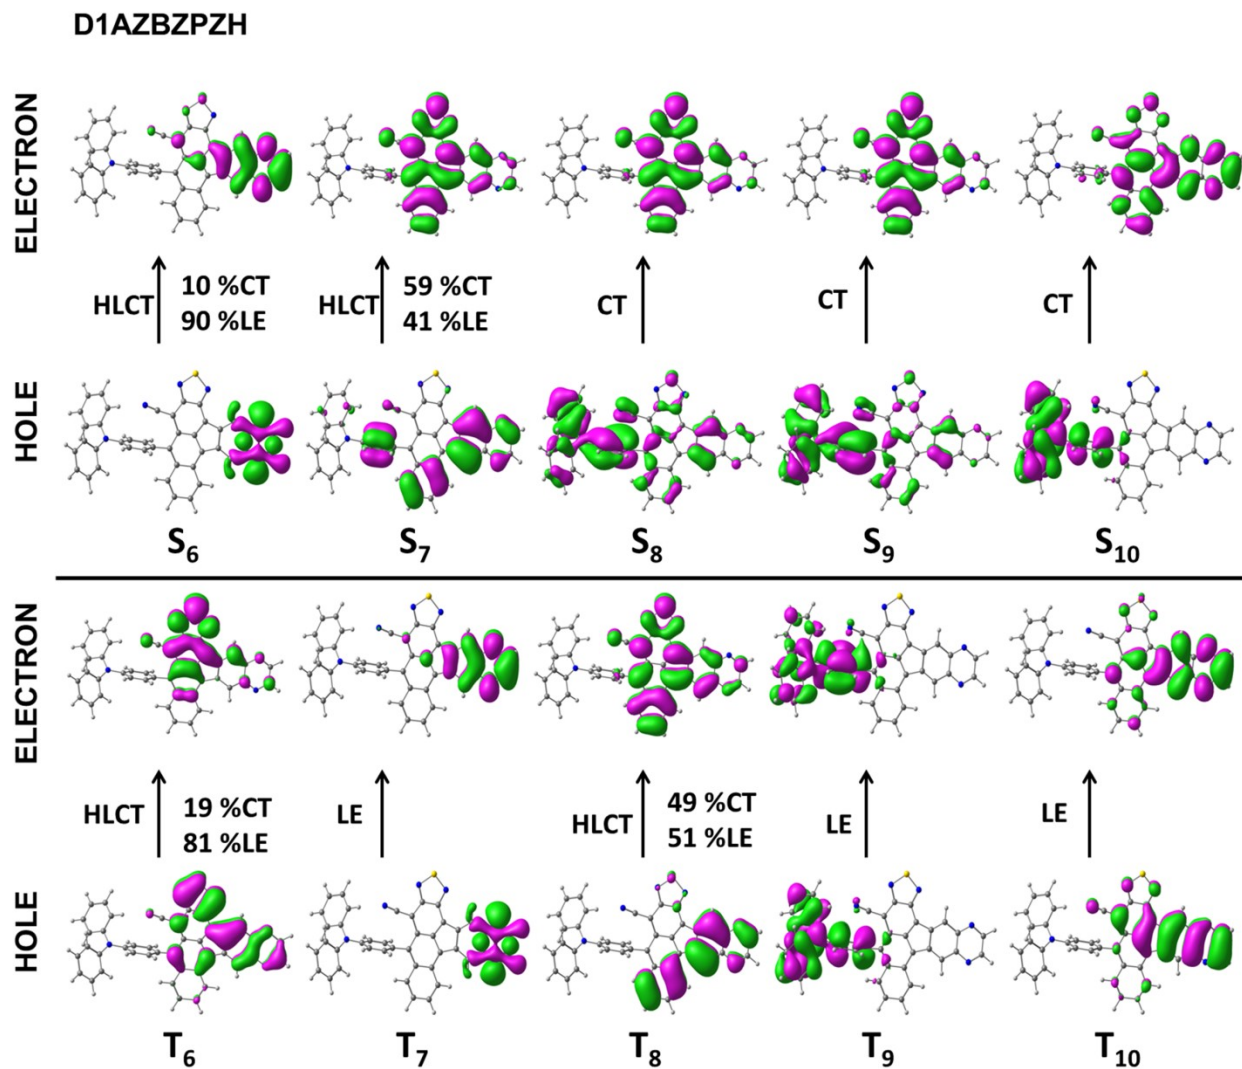

**Figure S4.** Spatial distribution of the hole and electron wavefunctions corresponds to the singlet (S<sub>6</sub>-S<sub>10</sub>) and triplet (T<sub>6</sub>-T<sub>10</sub>) excited states of the three potential molecules.

**Table S3.** Calculated  $\Delta r$  indices of the newly designed molecules for the  $S_n$  and  $T_m$  states in Å units.

|                  | S1   | S2   | S3   | S4   | S5   | S6   | S7    | S8   | S9    | S10   | T1   | T2   | T3   | T4   | T5   | T6   | T7    | T8   | T9   | T10  |
|------------------|------|------|------|------|------|------|-------|------|-------|-------|------|------|------|------|------|------|-------|------|------|------|
| <b>D1AZ2BZH</b>  | 1.86 | 7.36 | 2.60 | 3.67 | 2.73 | 1.75 | 6.05  | 8.06 | 2.43  | 9.15  | 1.43 | 2.98 | 7.32 | 2.48 | 3.41 | 1.72 | 2.28  | 1.64 | 1.88 | 1.36 |
|                  | LE   | CT   | HLCT | HLCT | HLCT | LE   | CT    | CT   | HLCT  | CT    | LE   | HLCT | CT   | HLCT | HLCT | LE   | HLCT  | LE   | LE   | LE   |
| <b>D1AZ2BZF</b>  | 3.01 | 6.15 | 2.83 | 3.39 | 2.64 | 2.49 | 5.44  | 7.57 | 8.50  | 3.13  | 1.43 | 6.33 | 4.12 | 2.11 | 3.15 | 2.02 | 2.09  | 1.64 | 1.92 | 1.46 |
|                  | HLCT | CT   | HLCT | HLCT | HLCT | HLCT | CT    | CT   | CT    | HLCT  | LE   | CT   | HLCT | HLCT | HLCT | HLCT | HLCT  | LE   | LE   | LE   |
| <b>D1AZ2BZCN</b> | 7.49 | 1.67 | 2.22 | 3.54 | 3.72 | 4.85 | 7.47  | 4.26 | 9.92  | 5.77  | 1.39 | 7.70 | 2.43 | 1.70 | 2.65 | 3.05 | 2.54  | 2.22 | 2.96 | 6.47 |
|                  | CT   | LE   | HLCT | HLCT | HLCT | HLCT | CT    | HLCT | CT    | CT    | LE   | CT   | HLCT | LE   | HLCT | HLCT | HLCT  | HLCT | HLCT | CT   |
| <b>D1AZ2PZH</b>  | 7.47 | 1.73 | 1.98 | 2.95 | 3.23 | 3.59 | 10.36 | 4.09 | 4.61  | 7.00  | 1.61 | 7.45 | 2.34 | 2.10 | 1.87 | 3.02 | 4.32  | 2.93 | 3.21 | 8.20 |
|                  | CT   | LE   | LE   | HLCT | HLCT | HLCT | CT    | HLCT | HLCT  | CT    | LE   | CT   | HLCT | HLCT | LE   | HLCT | HLCT  | HLCT | HLCT | CT   |
| <b>D1AZ2PZF</b>  | 7.41 | 1.72 | 2.26 | 4.26 | 3.23 | 9.79 | 5.14  | 1.22 | 3.47  | 7.42  | 1.61 | 7.39 | 2.51 | 1.85 | 3.11 | 1.33 | 2.74  | 2.40 | 3.19 | 8.69 |
|                  | CT   | LE   | HLCT | HLCT | HLCT | CT   | HLCT  | LE   | HLCT  | CT    | LE   | CT   | HLCT | LE   | HLCT | LE   | HLCT  | HLCT | HLCT | CT   |
| <b>D1AZ2PZCN</b> | 7.43 | 1.69 | 6.06 | 9.07 | 0.83 | 2.67 | 6.57  | 3.54 | 7.39  | 1.94  | 1.68 | 7.26 | 2.96 | 3.98 | 1.62 | 0.63 | 10.72 | 2.22 | 2.95 | 3.74 |
|                  | CT   | LE   | CT   | CT   | LE   | HLCT | CT    | HLCT | CT    | LE    | LE   | CT   | HLCT | HLCT | LE   | LE   | CT    | HLCT | HLCT | HLCT |
| <b>D1AZBZPZH</b> | 5.38 | 3.74 | 2.21 | 2.93 | 3.11 | 3.24 | 3.97  | 5.82 | 6.27  | 10.52 | 1.42 | 7.48 | 2.63 | 1.83 | 3.15 | 2.29 | 3.29  | 2.41 | 1.66 | 1.72 |
|                  | HLCT  | CT   | CT    | CT    | LE   | CT   | HLCT | LE   | HLCT | HLCT | HLCT  | HLCT | LE   | LE   |
| <b>D1AZBZPZF</b> | 7.22 | 1.90 | 2.36 | 3.08 | 4.95 | 5.24 | 7.42  | 2.32 | 10.57 | 7.81  | 1.43 | 7.60 | 2.62 | 2.28 | 3.17 | 2.58 | 2.01  | 1.78 | 1.75 | 3.33 |

|                   |      |      |      |      |       |      |      |      |      |      |      |      |      |      |      |      |      |       |      |      |
|-------------------|------|------|------|------|-------|------|------|------|------|------|------|------|------|------|------|------|------|-------|------|------|
|                   | CT   | LE   | HLCT | HLCT | HLCT  | HLCT | CT   | HLCT | CT   | CT   | LE   | CT   | HLCT | HLCT | HLCT | HLCT | HLCT | LE    | LE   | HLCT |
| <b>D1AZBPZCN</b>  | 7.68 | 1.49 | 2.25 | 4.90 | 11.59 | 6.00 | 3.71 | 6.86 | 3.10 | 7.46 | 1.39 | 7.68 | 2.50 | 3.43 | 2.31 | 2.73 | 1.34 | 12.20 | 2.47 | 3.10 |
|                   | CT   | LE   | HLCT | HLCT | CT    | CT   | HLCT | CT   | HLCT | CT   | LE   | CT   | HLCT | HLCT | HLCT | HLCT | LE   | CT    | HLCT | HLCT |
| <b>D1AZPZBZH</b>  | 7.11 | 2.08 | 2.85 | 3.42 | 2.59  | 3.63 | 4.61 | 1.04 | 6.31 | 6.62 | 1.60 | 7.52 | 2.72 | 2.34 | 2.46 | 2.34 | 2.39 | 2.19  | 3.81 | 0.99 |
|                   | CT   | HLCT | HLCT | HLCT | HLCT  | HLCT | HLCT | LE   | CT   | CT   | LE   | CT   | HLCT | HLCT | HLCT | HLCT | HLCT | HLCT  | HLCT | LE   |
| <b>D1AZPZBZF</b>  | 7.28 | 1.88 | 3.15 | 3.42 | 2.91  | 3.84 | 6.20 | 6.01 | 0.94 | 8.35 | 1.61 | 7.48 | 2.97 | 1.89 | 2.68 | 2.03 | 2.59 | 1.02  | 2.39 | 2.17 |
|                   | CT   | LE   | HLCT | HLCT | HLCT  | HLCT | CT   | CT   | LE   | CT   | LE   | CT   | HLCT | LE   | HLCT | HLCT | HLCT | LE    | HLCT | HLCT |
| <b>D1AZPZBZCN</b> | 7.48 | 1.66 | 2.63 | 4.50 | 9.32  | 2.65 | 6.34 | 5.25 | 5.41 | 1.26 | 1.57 | 7.46 | 2.74 | 2.65 | 3.21 | 1.10 | 2.24 | 9.92  | 1.53 | 2.75 |
|                   | CT   | LE   | HLCT | HLCT | CT    | HLCT | CT   | HLCT | HLCT | LE   | LE   | CT   | HLCT | HLCT | HLCT | LE   | HLCT | CT    | LE   | HLCT |

---

**Table S4.** Charge transfer ratio among fragments of potential hot-exciton NIR-TADF emitters.

| <b>D1AZ2BZH</b>      |          |          |          |                      |          |          |          |                      |          |          |          |                      |          |          |          |                       |          |          |          |
|----------------------|----------|----------|----------|----------------------|----------|----------|----------|----------------------|----------|----------|----------|----------------------|----------|----------|----------|-----------------------|----------|----------|----------|
| <b>S<sub>1</sub></b> | <b>1</b> | <b>2</b> | <b>3</b> | <b>S<sub>2</sub></b> | <b>1</b> | <b>2</b> | <b>3</b> | <b>S<sub>3</sub></b> | <b>1</b> | <b>2</b> | <b>3</b> | <b>S<sub>4</sub></b> | <b>1</b> | <b>2</b> | <b>3</b> | <b>S<sub>5</sub></b>  | <b>1</b> | <b>2</b> | <b>3</b> |
| <b>1</b>             | 0.000    | 0.032    | 0.003    | <b>1</b>             | 0.000    | 0.850    | 0.104    | <b>1</b>             | 0.000    | 0.004    | -0.001   | <b>1</b>             | 0.000    | 0.006    | -0.002   | <b>1</b>              | 0.000    | 0.032    | 0.005    |
| <b>2</b>             |          | 0.000    | -0.135   | <b>2</b>             |          | 0.000    | -0.003   | <b>2</b>             |          | 0.000    | -0.457   | <b>2</b>             |          | 0.000    | -0.624   | <b>2</b>              |          | 0.000    | 0.056    |
| <b>3</b>             |          |          | 0.000    | <b>3</b>              |          |          | 0.000    |
|                      |          |          |          |                      |          |          |          |                      |          |          |          |                      |          |          |          |                       |          |          |          |
| <b>S<sub>6</sub></b> | <b>1</b> | <b>2</b> | <b>3</b> | <b>S<sub>7</sub></b> | <b>1</b> | <b>2</b> | <b>3</b> | <b>S<sub>8</sub></b> | <b>1</b> | <b>2</b> | <b>3</b> | <b>S<sub>9</sub></b> | <b>1</b> | <b>2</b> | <b>3</b> | <b>S<sub>10</sub></b> | <b>1</b> | <b>2</b> | <b>3</b> |
| <b>1</b>             | 0.000    | 0.033    | 0.024    | <b>1</b>             | 0.000    | 0.819    | 0.101    | <b>1</b>             | 0.000    | 0.812    | 0.115    | <b>1</b>             | 0.000    | 0.004    | 0.001    | <b>1</b>              | 0.000    | 0.587    | 0.388    |
| <b>2</b>             |          | 0.000    | 0.160    | <b>2</b>             |          | 0.000    | -0.001   | <b>2</b>             |          | 0.000    | 0.005    | <b>2</b>             |          | 0.000    | -0.097   | <b>2</b>              |          | 0.000    | 0.005    |
| <b>3</b>             |          |          | 0.000    | <b>3</b>              |          |          | 0.000    |
|                      |          |          |          |                      |          |          |          |                      |          |          |          |                      |          |          |          |                       |          |          |          |
| <b>T<sub>1</sub></b> | <b>1</b> | <b>2</b> | <b>3</b> | <b>T<sub>2</sub></b> | <b>1</b> | <b>2</b> | <b>3</b> | <b>T<sub>3</sub></b> | <b>1</b> | <b>2</b> | <b>3</b> | <b>T<sub>4</sub></b> | <b>1</b> | <b>2</b> | <b>3</b> | <b>T<sub>5</sub></b>  | <b>1</b> | <b>2</b> | <b>3</b> |
| <b>1</b>             | 0.000    | 0.013    | 0.002    | <b>1</b>             | 0.000    | 0.096    | 0.018    | <b>1</b>             | 0.000    | 0.003    | 0.039    | <b>1</b>             | 0.000    | 0.013    | 0.002    | <b>1</b>              | 0.000    | 0.005    | -0.002   |
| <b>2</b>             |          | 0.000    | -0.001   | <b>2</b>             |          | 0.000    | -0.164   | <b>2</b>             |          | 0.000    | 0.005    | <b>2</b>             |          | 0.000    | 0.080    | <b>2</b>              |          | 0.000    | -0.625   |
| <b>3</b>             |          |          | 0.000    | <b>3</b>              |          |          | 0.000    |
|                      |          |          |          |                      |          |          |          |                      |          |          |          |                      |          |          |          |                       |          |          |          |
| <b>T<sub>6</sub></b> | <b>1</b> | <b>2</b> | <b>3</b> | <b>T<sub>7</sub></b> | <b>1</b> | <b>2</b> | <b>3</b> | <b>T<sub>8</sub></b> | <b>1</b> | <b>2</b> | <b>3</b> | <b>T<sub>9</sub></b> | <b>1</b> | <b>2</b> | <b>3</b> | <b>T<sub>10</sub></b> | <b>1</b> | <b>2</b> | <b>3</b> |
| <b>1</b>             | 0.000    | 0.011    | 0.005    | <b>1</b>             | 0.000    | 0.001    | 0.001    | <b>1</b>             | 0.000    | 0.031    | 0.000    | <b>1</b>             | 0.000    | 0.018    | 0.005    | <b>1</b>              | 0.000    | -0.012   | 0.001    |
| <b>2</b>             |          | 0.000    | -0.088   | <b>2</b>             |          | 0.000    | -0.064   | <b>2</b>             |          | 0.000    | 0.000    | <b>2</b>             |          | 0.000    | 0.038    | <b>2</b>              |          | 0.000    | 0.000    |
| <b>3</b>             |          |          | 0.000    | <b>3</b>              |          |          | 0.000    |

| <b>D1AZ2BZF</b>      |          |          |          |                      |          |          |          |                      |          |          |          |                      |          |          |          |                      |          |          |          |
|----------------------|----------|----------|----------|----------------------|----------|----------|----------|----------------------|----------|----------|----------|----------------------|----------|----------|----------|----------------------|----------|----------|----------|
| <b>S<sub>1</sub></b> | <b>1</b> | <b>2</b> | <b>3</b> | <b>S<sub>2</sub></b> | <b>1</b> | <b>2</b> | <b>3</b> | <b>S<sub>3</sub></b> | <b>1</b> | <b>2</b> | <b>3</b> | <b>S<sub>4</sub></b> | <b>1</b> | <b>2</b> | <b>3</b> | <b>S<sub>5</sub></b> | <b>1</b> | <b>2</b> | <b>3</b> |
| <b>1</b>             | 0.000    | 0.170    | 0.020    | <b>1</b>             | 0.000    | 0.712    | 0.085    | <b>1</b>             | 0.000    | 0.004    | -0.001   | <b>1</b>             | 0.000    | 0.022    | 0.001    | <b>1</b>             | 0.000    | 0.049    | 0.008    |
| <b>2</b>             |          | 0.000    | -0.096   | <b>2</b>             |          | 0.000    | -0.022   | <b>2</b>             |          | 0.000    | -0.488   | <b>2</b>             |          | 0.000    | -0.607   | <b>2</b>             |          | 0.000    | 0.067    |

|                      |          |          |          |                      |          |          |          |                      |          |          |          |                      |          |          |          |                       |          |          |          |
|----------------------|----------|----------|----------|----------------------|----------|----------|----------|----------------------|----------|----------|----------|----------------------|----------|----------|----------|-----------------------|----------|----------|----------|
| 3                    |          |          | 0.000    | 3                    |          |          | 0.000    | 3                    |          |          | 0.000    | 3                    |          |          | 0.000    | 3                     |          |          | 0.000    |
| <b>S<sub>6</sub></b> | <b>1</b> | <b>2</b> | <b>3</b> | <b>S<sub>7</sub></b> | <b>1</b> | <b>2</b> | <b>3</b> | <b>S<sub>8</sub></b> | <b>1</b> | <b>2</b> | <b>3</b> | <b>S<sub>9</sub></b> | <b>1</b> | <b>2</b> | <b>3</b> | <b>S<sub>10</sub></b> | <b>1</b> | <b>2</b> | <b>3</b> |
| 1                    | 0.000    | 0.086    | 0.069    | 1                    | 0.000    | 0.705    | 0.104    | 1                    | 0.000    | 0.807    | 0.113    | 1                    | 0.000    | 0.496    | 0.351    | 1                     | 0.000    | 0.085    | 0.036    |
| 2                    |          | 0.000    | 0.175    | 2                    |          | 0.000    | -0.011   | 2                    |          | 0.000    | 0.004    | 2                    |          | 0.000    | 0.016    | 2                     |          | 0.000    | -0.044   |
| 3                    |          |          | 0.000    | 3                    |          |          | 0.000    | 3                    |          |          | 0.000    | 3                    |          |          | 0.000    | 3                     |          |          | 0.000    |
| <b>T<sub>1</sub></b> | <b>1</b> | <b>2</b> | <b>3</b> | <b>T<sub>2</sub></b> | <b>1</b> | <b>2</b> | <b>3</b> | <b>T<sub>3</sub></b> | <b>1</b> | <b>2</b> | <b>3</b> | <b>T<sub>4</sub></b> | <b>1</b> | <b>2</b> | <b>3</b> | <b>T<sub>5</sub></b>  | <b>1</b> | <b>2</b> | <b>3</b> |
| 1                    | 0.000    | 0.014    | 0.002    | 1                    | 0.000    | 0.622    | 0.088    | 1                    | 0.000    | 0.257    | 0.046    | 1                    | 0.000    | 0.007    | 0.002    | 1                     | 0.000    | 0.025    | 0.002    |
| 2                    |          | 0.000    | 0.0004   | 2                    |          | 0.000    | -0.107   | 2                    |          | 0.000    | -0.133   | 2                    |          | 0.000    | 0.098    | 2                     |          | 0.000    | -0.598   |
| 3                    |          |          | 0.000    | 3                    |          |          | 0.000    | 3                    |          |          | 0.000    | 3                    |          |          | 0.000    | 3                     |          |          | 0.000    |
| <b>T<sub>6</sub></b> | <b>1</b> | <b>2</b> | <b>3</b> | <b>T<sub>7</sub></b> | <b>1</b> | <b>2</b> | <b>3</b> | <b>T<sub>8</sub></b> | <b>1</b> | <b>2</b> | <b>3</b> | <b>T<sub>9</sub></b> | <b>1</b> | <b>2</b> | <b>3</b> | <b>T<sub>10</sub></b> | <b>1</b> | <b>2</b> | <b>3</b> |
| 1                    | 0.000    | 0.010    | 0.005    | 1                    | 0.000    | 0.007    | 0.006    | 1                    | 0.000    | 0.031    | -0.0002  | 1                    | 0.000    | 0.028    | 0.009    | 1                     | 0.000    | -0.001   | 0.006    |
| 2                    |          | 0.000    | -0.090   | 2                    |          | 0.000    | -0.069   | 2                    |          | 0.000    | -0.0001  | 2                    |          | 0.000    | 0.008    | 2                     |          | 0.000    | 0.0001   |
| 3                    |          |          | 0.000    | 3                    |          |          | 0.000    | 3                    |          |          | 0.000    | 3                    |          |          | 0.000    | 3                     |          |          | 0.000    |

| <b>D1AZBZPZH</b>     |          |          |          |                      |          |          |          |                      |          |          |          |                      |          |          |          |                       |          |          |          |
|----------------------|----------|----------|----------|----------------------|----------|----------|----------|----------------------|----------|----------|----------|----------------------|----------|----------|----------|-----------------------|----------|----------|----------|
| <b>S<sub>1</sub></b> | <b>1</b> | <b>2</b> | <b>3</b> | <b>S<sub>2</sub></b> | <b>1</b> | <b>2</b> | <b>3</b> | <b>S<sub>3</sub></b> | <b>1</b> | <b>2</b> | <b>3</b> | <b>S<sub>4</sub></b> | <b>1</b> | <b>2</b> | <b>3</b> | <b>S<sub>5</sub></b>  | <b>1</b> | <b>2</b> | <b>3</b> |
| 1                    | 0.000    | 0.511    | 0.060    | 1                    | 0.000    | 0.367    | 0.043    | 1                    | 0.000    | 0.005    | -0.001   | 1                    | 0.000    | 0.002    | 0.005    | 1                     | 0.000    | 0.071    | 0.035    |
| 2                    |          | 0.000    | -0.026   | 2                    |          | 0.000    | -0.036   | 2                    |          | 0.000    | -0.400   | 2                    |          | 0.000    | 0.319    | 2                     |          | 0.000    | 0.207    |
| 3                    |          |          | 0.000    | 3                    |          |          | 0.000    | 3                    |          |          | 0.000    | 3                    |          |          | 0.000    | 3                     |          |          | 0.000    |
| <b>S<sub>6</sub></b> | <b>1</b> | <b>2</b> | <b>3</b> | <b>S<sub>7</sub></b> | <b>1</b> | <b>2</b> | <b>3</b> | <b>S<sub>8</sub></b> | <b>1</b> | <b>2</b> | <b>3</b> | <b>S<sub>9</sub></b> | <b>1</b> | <b>2</b> | <b>3</b> | <b>S<sub>10</sub></b> | <b>1</b> | <b>2</b> | <b>3</b> |
| 1                    | 0.000    | -0.00003 | -0.013   | 1                    | 0.000    | 0.177    | 0.035    | 1                    | 0.000    | 0.658    | 0.123    | 1                    | 0.000    | 0.675    | 0.122    | 1                     | 0.000    | 0.464    | 0.510    |
| 2                    |          | 0.000    | -0.081   | 2                    |          | 0.000    | -0.374   | 2                    |          | 0.000    | -0.070   | 2                    |          | 0.000    | -0.055   | 2                     |          | 0.000    | 0.009    |
| 3                    |          |          | 0.000    | 3                    |          |          | 0.000    | 3                    |          |          | 0.000    | 3                    |          |          | 0.000    | 3                     |          |          | 0.000    |

|                      |          |          |          |                      |          |          |          |                      |          |          |          |                      |          |          |          |                       |          |          |          |
|----------------------|----------|----------|----------|----------------------|----------|----------|----------|----------------------|----------|----------|----------|----------------------|----------|----------|----------|-----------------------|----------|----------|----------|
| <b>T<sub>1</sub></b> | <b>1</b> | <b>2</b> | <b>3</b> | <b>T<sub>2</sub></b> | <b>1</b> | <b>2</b> | <b>3</b> | <b>T<sub>3</sub></b> | <b>1</b> | <b>2</b> | <b>3</b> | <b>T<sub>4</sub></b> | <b>1</b> | <b>2</b> | <b>3</b> | <b>T<sub>5</sub></b>  | <b>1</b> | <b>2</b> | <b>3</b> |
| <b>1</b>             | 0.000    | 0.008    | 0.001    | <b>1</b>             | 0.000    | 0.845    | 0.100    | <b>1</b>             | 0.000    | 0.041    | 0.007    | <b>1</b>             | 0.000    | 0.004    | 0.001    | <b>1</b>              | 0.000    | 0.004    | 0.009    |
| <b>2</b>             |          | 0.000    | -0.036   | <b>2</b>             |          | 0.000    | -0.012   | <b>2</b>             |          | 0.000    | -0.143   | <b>2</b>             |          | 0.000    | 0.113    | <b>2</b>              |          | 0.000    | 0.224    |
| <b>3</b>             |          |          | 0.000    | <b>3</b>              |          |          | 0.000    |
|                      |          |          |          |                      |          |          |          |                      |          |          |          |                      |          |          |          |                       |          |          |          |
| <b>T<sub>6</sub></b> | <b>1</b> | <b>2</b> | <b>3</b> | <b>T<sub>7</sub></b> | <b>1</b> | <b>2</b> | <b>3</b> | <b>T<sub>8</sub></b> | <b>1</b> | <b>2</b> | <b>3</b> | <b>T<sub>9</sub></b> | <b>1</b> | <b>2</b> | <b>3</b> | <b>T<sub>10</sub></b> | <b>1</b> | <b>2</b> | <b>3</b> |
| <b>1</b>             | 0.000    | 0.006    | 0.001    | <b>1</b>             | 0.000    | -0.0001  | -0.018   | <b>1</b>             | 0.000    | 0.010    | -0.006   | <b>1</b>             | 0.000    | 0.032    | 0.001    | <b>1</b>              | 0.000    | 0.002    | 0.004    |
| <b>2</b>             |          | 0.000    | -0.180   | <b>2</b>             |          | 0.000    | -0.035   | <b>2</b>             |          | 0.000    | -0.469   | <b>2</b>             |          | 0.000    | 0.00002  | <b>2</b>              |          | 0.000    | 0.088    |
| <b>3</b>             |          |          | 0.000    | <b>3</b>              |          |          | 0.000    |

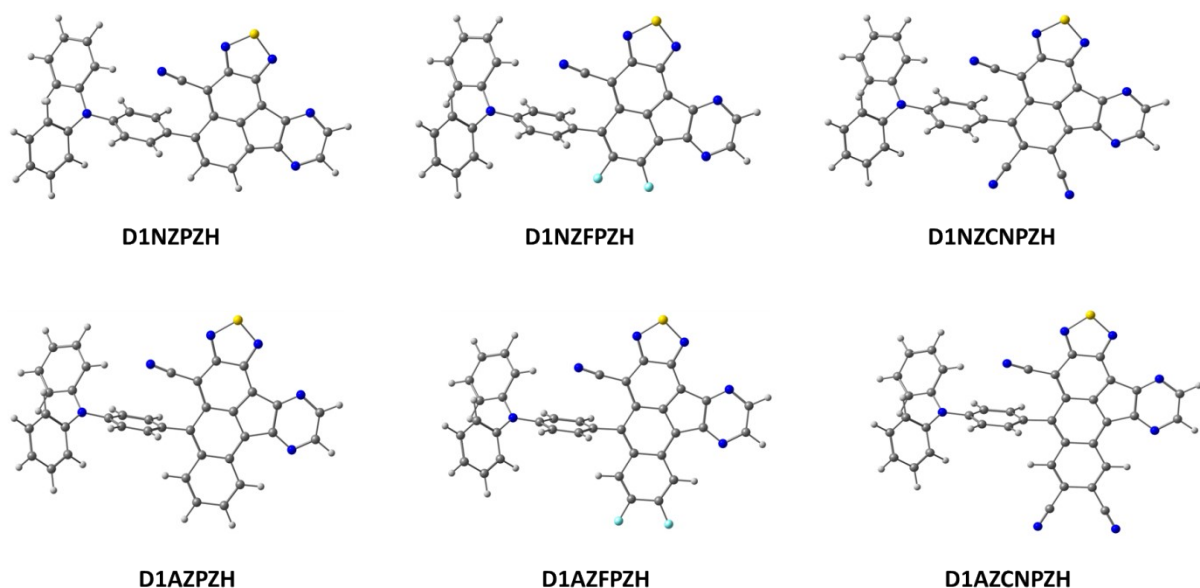

**Figure S5.** Optimized geometries of NZ and AZ based newly designed molecules (D1NZPZH, D1NZFPZH, D1NZCNPZH, D1AZPZH, D1AZFPZH, and D1AZCNPZH) as determined at the M06-2X/6-31G\*\* level of theory.

**Table S5.** Calculated excited state energies, absorption wavelengths and HOMO and LUMO gap of some inspirational molecules towards D-A1-A2 type molecules as obtained from M06-2X/6-31G\*\* level of theory in the gas phase.

|                  | S <sub>1</sub> | S <sub>2</sub> | S <sub>3</sub> | S <sub>4</sub> | S <sub>5</sub> | T <sub>1</sub> | T <sub>2</sub> | T <sub>3</sub> | T <sub>4</sub> | T <sub>5</sub> | S <sub>1</sub> -T <sub>1</sub> | T <sub>2</sub> -T <sub>1</sub> | Absorption $\lambda$ | HLG  |
|------------------|----------------|----------------|----------------|----------------|----------------|----------------|----------------|----------------|----------------|----------------|--------------------------------|--------------------------------|----------------------|------|
|                  | (eV)                           | (eV)                           | (nm)                 | (eV) |
| <b>D1NZPZH</b>   | 2.08           | 2.85           | 3.03           | 3.48           | 3.83           | 1.42           | 2.05           | 2.53           | 2.90           | 3.29           | 0.66                           | 0.64                           | 597                  | 3.23 |
| <b>D1NZFPZH</b>  | 2.06           | 2.92           | 3.15           | 3.53           | 3.82           | 1.53           | 2.05           | 2.61           | 2.80           | 3.30           | 0.53                           | 0.52                           | 602                  | 3.20 |
| <b>D1NZCNPZH</b> | 1.63           | 2.73           | 2.98           | 3.25           | 3.40           | 1.33           | 1.63           | 2.44           | 2.84           | 3.16           | 0.30                           | 0.30                           | 761                  | 2.78 |
| <b>D1AZPZH</b>   | 1.86           | 2.02           | 2.66           | 3.25           | 3.50           | 0.76           | 1.85           | 1.93           | 2.64           | 3.09           | 1.10                           | 1.10                           | 667                  | 3.03 |
| <b>D1AZFPZH</b>  | 1.81           | 2.11           | 2.67           | 3.28           | 3.48           | 0.82           | 1.81           | 1.97           | 2.60           | 3.13           | 0.99                           | 0.99                           | 684                  | 2.98 |
| <b>D1AZCNPZH</b> | 1.51           | 2.16           | 2.56           | 3.16           | 3.32           | 0.78           | 1.50           | 1.91           | 2.69           | 3.03           | 0.73                           | 0.72                           | 820                  | 2.68 |



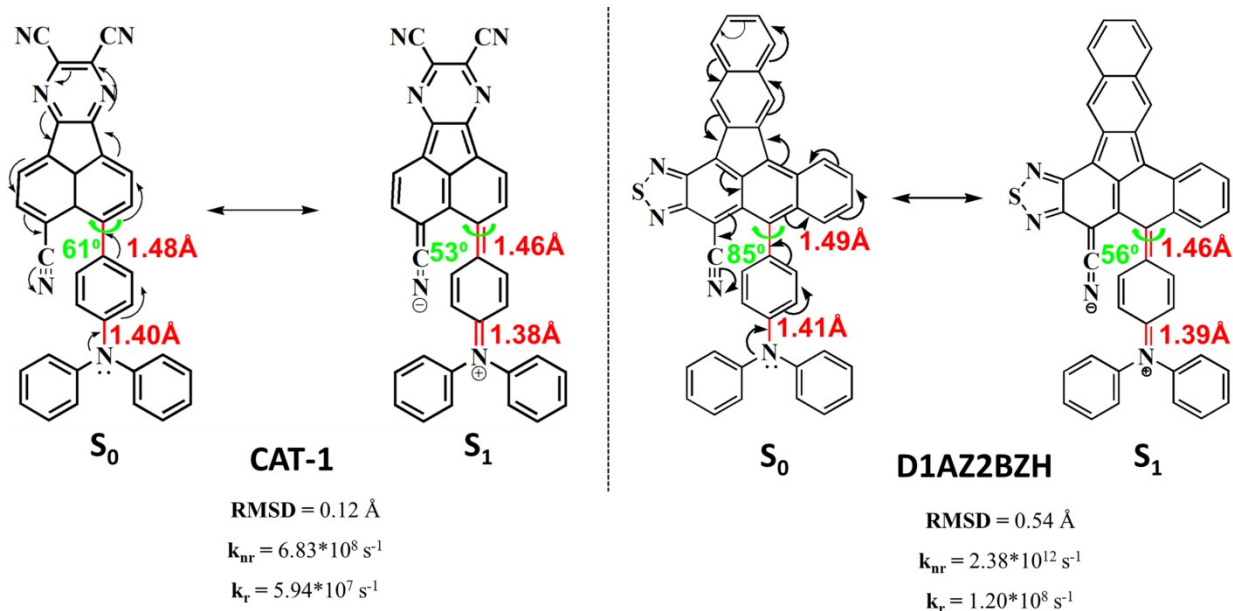

**Figure S6.** Comparison of geometrical parameters, RMSD,  $k_{nr}$  and  $k_r$  of CAT-1 and D1AZ2BZH at M06-2X/6-31G\*\* level of theory.

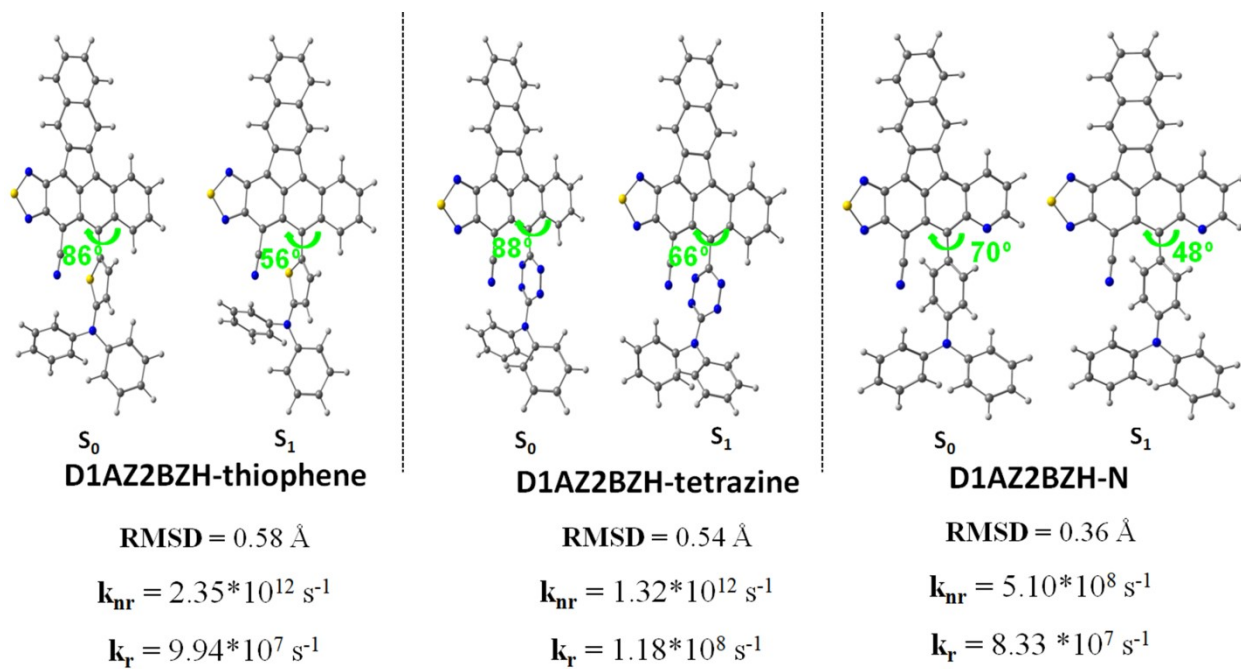

**Figure S7.** Comparison of new structures based on thiophene and tetrazine substituted D1AZ2BZH at M06-2X/6-31G\*\* level of theory.
